# Supplementary material for: Interplay of Coriolis effect with rheology results in unique blood dynamics on a compact disc
Source: Royal Society of Chemistry journal article supplement (doi:10.1039/c9an00645a), 2019-01-01
Supplement: c9an00645a1.pdf [file c9an00645a1.pdf]

**Supplementary Material for**  
**“Interplay of Coriolis Effect with Rheology Results in Unique Blood Dynamics on a Compact Disk”**

Rahul Agarwal,<sup>1</sup> Arnab Sarkar,<sup>2,3</sup> Suman Chakraborty<sup>1,3</sup>

<sup>1</sup> Department of Mechanical Engineering, Indian Institute of Technology Kharagpur, Kharagpur – 721302, India. E-mail: [suman@mech.iitkgp.ernet.in](mailto:suman@mech.iitkgp.ernet.in)

<sup>2</sup> Department of Mechanical Engineering, Indian Institute of Technology (BHU) Varanasi, Varanasi – 221005, India.

<sup>3</sup> School of Medical Science and Technology, Indian Institute of Technology Kharagpur, Kharagpur – 721302, India.

### Strouhal number for dimensionless rotational speed representation

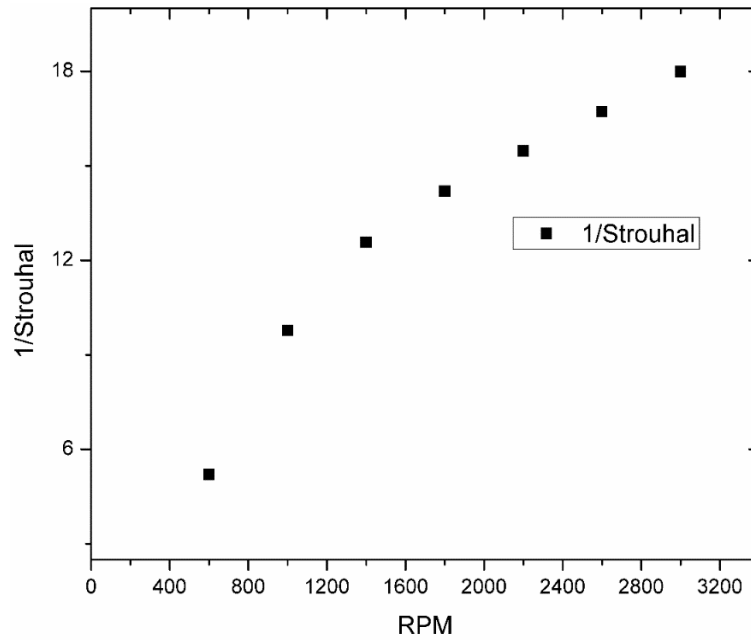

**Fig. 1** Variation of the inverse Strouhal number as a function of RPM for a representative case. Since, the inverse Strouhal number increases monotonically with the rotational speed, it has been chosen as the appropriate non-dimensional representation of the frequency of rotation.
